# Supplementary material for: Active sites-enriched hierarchical MoS2 nanotubes: highly active and stable architecture for boosting hydrogen evolution and lithium storage
Source: Royal Society of Chemistry journal article supplement (doi:10.1039/c6ta02034h), 2016-01-01
Supplement: c6ta02034h1.pdf [file c6ta02034h1.pdf]

## Electronic Supplementary Information

### Active Sites-enriched Hierarchical MoS<sub>2</sub> Nanotubes: Highly Active and Stable

### Architectures for Boosting Hydrogen Evolution and Lithium Storage

Jin Wang,<sup>† †//</sup> Jilei Liu,<sup># †//</sup> Hao Yang,<sup>‡\*</sup> Zhen Chen,<sup>† †</sup> Jianyi Lin,<sup># \*</sup> and Ze Xiang Shen<sup>† †\*</sup>

<sup>†</sup> *Energy Research Institute (ERI@N), Interdisciplinary Graduate School, Nanyang Technological University, Research Techno Plaza, 50 Nanyang Drive, 637553, Singapore*

<sup>‡</sup> *Division of Physics and Applied Physics, School of Physical and Mathematical Sciences, Nanyang Technological University, 21 Nanyang Link, 637371, Singapore*

<sup>#</sup> *Energy Research Institute (ERI@N), Nanyang Technological University, 50 Nanyang Drive, 637553, Singapore*

<sup>‡</sup> *Jiangsu Key Laboratory of Advanced Laser Materials and Devices, School of Physics and Electronic Engineering, Jiangsu Normal University, Xuzhou 221116, China.*

*\*E-mail: zexiang@ntu.edu.sg; Lijy@ntu.edu.sg; yanghao@jsnu.edu.cn*

*//J. Wang and J. L. Liu contributed equally to this work.*

**Table S1** A survey of electrochemical properties of MoS<sub>2</sub> and its hybrid composites for LIBs.

| <b>Electrode description</b>                                    | <b>1st Specific capacity (mAhg<sup>-1</sup>)</b>                          | <b>1st Coulombic efficiency</b> | <b>Cycling stability</b>                                            | <b>Rate performance</b>                                                                                                                     |
|-----------------------------------------------------------------|---------------------------------------------------------------------------|---------------------------------|---------------------------------------------------------------------|---------------------------------------------------------------------------------------------------------------------------------------------|
| MT@MS/GF (this work)                                            | 1487 mAh g <sup>-1</sup> at 100 mA g <sup>-1</sup>                        | 81.7%                           | 892 mAh g <sup>-1</sup> after 200 cycles at 500 mA g <sup>-1</sup>  | 1025, 916 and 775 mAh g <sup>-1</sup> at 1000, 2000 and 5000 mA g <sup>-1</sup>                                                             |
| Honeycomb-like MoS <sub>2</sub> nanoarchitectures on 3DGF [1]   | 1397 mAh g <sup>-1</sup> at 100 mA g <sup>-1</sup>                        | 82.9%                           | 1100 mAh g <sup>-1</sup> after 60 cycles at 200 mA g <sup>-1</sup>  | 1172, 1095, 1007, 966 and 800 mAh g <sup>-1</sup> at 200, 500, 1000, 2000 and 5000 mA g <sup>-1</sup>                                       |
| Worm-like MoS <sub>2</sub> nanoarchitectures on GF/CNTs film[3] | 1568 mAh g <sup>-1</sup> at 100 mA g <sup>-1</sup>                        | 79.8%                           | 1112 mAh g <sup>-1</sup> after 120 cycles at 200 mA g <sup>-1</sup> | 1368, 1140, 1064, 1006 and 823 mAh g <sup>-1</sup> at 200, 500, 1000, 2000 and 5000 mA g <sup>-1</sup>                                      |
| MoS <sub>2</sub> @graphene nanocables [4]                       | 1150 mAh g <sup>-1</sup> at 500 mA g <sup>-1</sup>                        |                                 | 900 mAh g <sup>-1</sup> after 700 cycles at 5 A g <sup>-1</sup>     | 1150 and 700 mAh g <sup>-1</sup> at 500 mA g <sup>-1</sup> and 10 A g <sup>-1</sup>                                                         |
| MoS <sub>2</sub> -carbon nanofiber composite [5]                | 1712 mAh g <sup>-1</sup> at 100 mA g <sup>-1</sup>                        | 74%                             | 1007 mAh g <sup>-1</sup> after 100 cycles at 1 A g <sup>-1</sup>    | 1095, 986, 768, 637, 620, 548 and 347 mAh g <sup>-1</sup> at 0.5, 1, 5, 10, 20, 30 and 50 A g <sup>-1</sup>                                 |
| MoS <sub>2</sub> -graphene-carbon nanotube nanocomposites [6]   | 949 mAh g <sup>-1</sup> at 100 mA g <sup>-1</sup>                         |                                 | 886 mAh g <sup>-1</sup> after 100 cycles at 1 A g <sup>-1</sup>     | 949, 883, 858, 737 and 652 mAh g <sup>-1</sup> at 100, 500, 1000, 5000 and 10000 mA g <sup>-1</sup>                                         |
| Hierarchical C@MoS <sub>2</sub> microspheres [7]                |                                                                           |                                 | 750 mAh g <sup>-1</sup> after 50 cycles at 100 mA g <sup>-1</sup>   | 500 mAh g <sup>-1</sup> at 1000 mA g <sup>-1</sup>                                                                                          |
| MoS <sub>2</sub> nanoflake array/carbon cloth[8]                | 3.5 mAh cm <sup>-2</sup> at a current density of 0.15 mA cm <sup>-2</sup> | 97.6%                           |                                                                     | 3.26, 2.73, 2.39, 1.72, 1.24, and 0.85 mAh cm <sup>-2</sup> at current densities of 0.15, 0.3, 0.75, 1.5, 2.25, and 3.0 mA cm <sup>-2</sup> |
| MoS <sub>2</sub> /3DGN <sup>[9]</sup>                           | 1222 mAh g <sup>-1</sup> at 100 mA g <sup>-1</sup>                        | 83.50%                          | 877 mAh g <sup>-1</sup> after 50 cycles                             | 849, 782, 692, 597 and 466 mAh g <sup>-1</sup> at                                                                                           |

|                                                                 |                                                        |        |                                                                           |                                                                                                                                  |
|-----------------------------------------------------------------|--------------------------------------------------------|--------|---------------------------------------------------------------------------|----------------------------------------------------------------------------------------------------------------------------------|
|                                                                 |                                                        |        | at 100 mA g <sup>-1</sup>                                                 | 100, 200, 500,<br>1000 and 4000 mA<br>g <sup>-1</sup>                                                                            |
| MoS <sub>2</sub> /graphene<br>nanosheet <sup>[10]</sup>         | 2200 mAh g <sup>-1</sup><br>at 100 mA g <sup>-1</sup>  | 59.10% | 1290 mAh g <sup>-1</sup><br>after 50 cycles<br>at 100 mA g <sup>-1</sup>  | 1040 mAh g <sup>-1</sup> at<br>1000 mA g <sup>-1</sup>                                                                           |
| MoS <sub>2</sub> /graphene<br>composites <sup>[11]</sup>        | 1462 mAh g <sup>-1</sup><br>at 100 mA g <sup>-1</sup>  | 58.5%  | 1187 mAh g <sup>-1</sup><br>after 100 cycles<br>at 100 mA g <sup>-1</sup> | 900 mAh g <sup>-1</sup> at<br>1000 mA g <sup>-1</sup>                                                                            |
| MoS <sub>2</sub> /amorphous<br>carbon <sup>[12]</sup>           | 2100 mAh g <sup>-1</sup><br>at 100 mA g <sup>-1</sup>  | 44.10% | 912 mAh g <sup>-1</sup><br>after 100 cycles<br>at 100 mA g <sup>-1</sup>  |                                                                                                                                  |
| CNT@MoS <sub>2</sub> <sup>[13]</sup>                            | 1434 mAh g <sup>-1</sup><br>at 100 mA g <sup>-1</sup>  | 60.01% | 698 mAh g <sup>-1</sup><br>after 60 cycles<br>at 100 mA g <sup>-1</sup>   | 653, 459 and 369<br>mAh g <sup>-1</sup> at 200,<br>500 and 1000 mA<br>g <sup>-1</sup>                                            |
| MoS <sub>2</sub> /amorphous<br>carbon <sup>[14]</sup>           | 2108 mAh g <sup>-1</sup><br>at 100 mA g <sup>-1</sup>  | 79%    | 755 mAh g <sup>-1</sup><br>after 100 cycles<br>at 100 mA g <sup>-1</sup>  | 850 mAh g <sup>-1</sup> at 400<br>mA g <sup>-1</sup>                                                                             |
| MoS <sub>2</sub> /PS<br>microspheres <sup>[15]</sup>            | 1160 mAh g <sup>-1</sup><br>at 100 mA g <sup>-1</sup>  | 68.20% | 672 mAh g <sup>-1</sup><br>after 50 cycles<br>at 100 mA g <sup>-1</sup>   | 726, 581 and 353<br>mAh g <sup>-1</sup> at 200,<br>500 and 1000 mA<br>g <sup>-1</sup>                                            |
| Graphene-network-<br>backnoned MoS <sub>2</sub> <sup>[16]</sup> | 1200 mAh g <sup>-1</sup><br>at 600 mA g <sup>-1</sup>  | 68%    | 1200 mAh g <sup>-1</sup><br>after 30 cycles<br>at 600 mA g <sup>-1</sup>  | 620 and 270 mAh<br>g <sup>-1</sup> at 7200 and<br>84000 mA g <sup>-1</sup>                                                       |
| MoS <sub>2</sub> nanoplates <sup>[17]</sup>                     | 1062 mAh g <sup>-1</sup><br>at 1062 mA g <sup>-1</sup> | 87%    | 907 mAh g <sup>-1</sup><br>after 50 cycles<br>at 100 mA g <sup>-1</sup>   | 790 and 700 mAh<br>g <sup>-1</sup> at 31.8 and<br>53.1A g <sup>-1</sup>                                                          |
| 3D MoS <sub>2</sub> flowers <sup>[18]</sup>                     | 869 mAh g <sup>-1</sup><br>at 100 mA g <sup>-1</sup>   | 65.90% | 633 mAh g <sup>-1</sup><br>after 50 cycles<br>at 100 mA g <sup>-1</sup>   | 848 and 740 mAh<br>g <sup>-1</sup> at 100 and 400<br>mA g <sup>-1</sup>                                                          |
| Mesoporous MoS <sub>2</sub> <sup>[19]</sup>                     | 1052 mAh g <sup>-1</sup><br>at 100 mA g <sup>-1</sup>  | 83.90% | 876 mAh g <sup>-1</sup><br>after 100 cycles<br>at 100 mA g <sup>-1</sup>  | 903, 880, 845, 795,<br>748, 670 and 608<br>mAh g <sup>-1</sup> at 100,<br>200, 500, 1000,<br>2000 and 5000 mA<br>g <sup>-1</sup> |
| MoS <sub>2</sub> /CNT<br>network <sup>[20]</sup>                | 1715 mAh g <sup>-1</sup><br>at 200 mA g <sup>-1</sup>  | 76.10% | 1456 mAh g <sup>-1</sup><br>after 50 cycles<br>at 200 mA g <sup>-1</sup>  | 1431, 1367, 1302<br>and 1224 mAh g <sup>-1</sup><br>at 400, 600, 800<br>and 1000 mA g <sup>-1</sup>                              |
| MoS <sub>x</sub> /CNT <sup>[21]</sup>                           | 1549 mAh g <sup>-1</sup><br>at 50 mA g <sup>-1</sup>   | 74.80% | ≥1000 mAh g <sup>-1</sup><br>after 40 cycles                              | 1119, 904, 659,<br>358 and 197 mAh                                                                                               |

|                                                                  |                                                        |        |                                                                           |                                                                                                                                  |
|------------------------------------------------------------------|--------------------------------------------------------|--------|---------------------------------------------------------------------------|----------------------------------------------------------------------------------------------------------------------------------|
|                                                                  |                                                        |        | at 50 mA g <sup>-1</sup>                                                  | g <sup>-1</sup> at 50, 200, 500 and 1000 mA g <sup>-1</sup>                                                                      |
| MoS <sub>2</sub> -CNT film <sup>[22]</sup>                       | 1117 mAh g <sup>-1</sup><br>at 100 mA g <sup>-1</sup>  | 73.40% | 960 mAh g <sup>-1</sup><br>after 100 cycles<br>at 100 mA g <sup>-1</sup>  | 670 (3200)<br>670 mAh g <sup>-1</sup> at<br>3200 mA g <sup>-1</sup>                                                              |
| Hollow MoS <sub>2</sub><br>nanoparticles <sup>[23]</sup>         | 1236 mAh g <sup>-1</sup><br>at 100 mA g <sup>-1</sup>  | 74%    | 902 mAh g <sup>-1</sup><br>after 80 cycles<br>at 100 mA g <sup>-1</sup>   | 1030, 950, 910,<br>850 and 780 mAh<br>g <sup>-1</sup> at 100, 200,<br>300, 500 and 1000<br>mA g <sup>-1</sup>                    |
| 3D MoS <sub>2</sub> assembly<br>tubes <sup>[24]</sup>            | 1172 mAh g <sup>-1</sup><br>at 100 mA g <sup>-1</sup>  | 68.30% | 839 mAh g <sup>-1</sup><br>after 50 cycles<br>at 100 mA g <sup>-1</sup>   | 600 and 500 mAh<br>g <sup>-1</sup> at 1000 and<br>5000 mA g <sup>-1</sup>                                                        |
| MoS <sub>2</sub> -graphene<br>composites <sup>[25]</sup>         | 1367 mAh g <sup>-1</sup><br>at 100 mA g <sup>-1</sup>  | 66.70% | 808 mAh g <sup>-1</sup><br>after 100 cycles<br>at 100 mA g <sup>-1</sup>  | 571 mAh g <sup>-1</sup> at<br>1000 mA g <sup>-1</sup>                                                                            |
| PEO/MoS <sub>2</sub> /graphene<br><sup>[26]</sup>                | 1150 mAh g <sup>-1</sup><br>at 50 mA g <sup>-1</sup>   | 74%    | ≥1000 mAh g <sup>-1</sup><br>after 180 cycles<br>at 50 mA g <sup>-1</sup> | 650 mAh g <sup>-1</sup> at 200<br>mA g <sup>-1</sup>                                                                             |
| MoS <sub>2</sub> /polyaniline <sup>[27]</sup>                    | 1460 mAh g <sup>-1</sup><br>at 100 mA g <sup>-1</sup>  | 72.80% | 953 mAh g <sup>-1</sup><br>after 50 cycles<br>at 100 mA g <sup>-1</sup>   | 1006 mAh g <sup>-1</sup> at<br>200 mA g <sup>-1</sup>                                                                            |
| MoS <sub>2</sub> /C nanotube <sup>[28]</sup>                     | 1320 mAh g <sup>-1</sup><br>at 200 mA g <sup>-1</sup>  | 70.50% | 776 mAh g <sup>-1</sup><br>after 100 cycles<br>at 200 mA g <sup>-1</sup>  | 450-600 mAh g <sup>-1</sup><br>at 1000 mA g <sup>-1</sup>                                                                        |
| MoS <sub>2</sub> @carbon<br>spheres <sup>[7]</sup>               | 1020 mAh g <sup>-1</sup><br>at 100 mA g <sup>-1</sup>  | 73.50% | 750 mAh g <sup>-1</sup><br>after 50 cycles<br>at 100 mA g <sup>-1</sup>   | 500 mAh g <sup>-1</sup> at<br>1000 mA g <sup>-1</sup>                                                                            |
| MoS <sub>2</sub> @carbon<br>layer <sup>[29]</sup>                | 1251 mAh g <sup>-1</sup><br>at 1000 mA g <sup>-1</sup> | 90.70% | 814 mAh g <sup>-1</sup><br>after 100 cycles<br>at 1000 mA g <sup>-1</sup> | 600 mAh g <sup>-1</sup> at<br>4000 mA g <sup>-1</sup>                                                                            |
| MoS <sub>2</sub> @CMK-3 <sup>[30]</sup>                          | 1056 mAh g <sup>-1</sup><br>at 250 mA g <sup>-1</sup>  | 78.03% | 602 mAh g <sup>-1</sup><br>after 100 cycles<br>at 250 mA g <sup>-1</sup>  | 832, 774, 666 and<br>564 mAh g <sup>-1</sup> at<br>250, 500, 1000 and<br>2000 mA g <sup>-1</sup>                                 |
| Fe <sub>3</sub> O <sub>4</sub> /MoS <sub>2</sub> <sup>[31]</sup> | 1320 mAh g <sup>-1</sup><br>at 100 mA g <sup>-1</sup>  | 81.74% | 1200 mAh g <sup>-1</sup><br>after 560 cycles<br>at 500 mA g <sup>-1</sup> | 1189, 943, 569,<br>362 and 270, 224<br>mAh g <sup>-1</sup> at 1000,<br>2000, 4000, 6000,<br>8000 and 10000<br>mA g <sup>-1</sup> |
| MoS <sub>2</sub> /TiO <sub>2</sub> <sup>[32]</sup>               | 931 mAh g <sup>-1</sup><br>at 100 mA g <sup>-1</sup>   | 74%    | 472 mAh g <sup>-1</sup><br>after 100 cycles<br>at 100 mA g <sup>-1</sup>  | 713, 636, 533 and<br>461 mAh g <sup>-1</sup> at<br>100, 200, 500 and                                                             |

1000 mA g<sup>-1</sup>**Table S2** A survey of electrochemical properties of MoS<sub>2</sub> and its hybrid composites for HER.

| Catalyst                                                           | Tafel Slope<br>[mV decade <sup>-1</sup> ] | Onset overpotential<br>[mV vs RHE] | Exchange current<br>densities (j <sub>0</sub> ) [mA<br>cm <sup>-2</sup> ] |
|--------------------------------------------------------------------|-------------------------------------------|------------------------------------|---------------------------------------------------------------------------|
| MT@MS/GF<br>(this work)                                            | 52                                        | 77                                 | 6.4*10 <sup>-2</sup>                                                      |
| Defect-rich MoS <sub>2</sub><br>nanosheets [32]                    | 50                                        | 120                                | 8.91*10 <sup>-3</sup>                                                     |
| MoS <sub>2</sub> /CoSe <sub>2</sub> hybrids [33]                   | 36                                        | 11                                 | 7.3*10 <sup>-2</sup>                                                      |
| graphene-surpported<br>MoS <sub>2</sub> [34]                       | 41                                        | ~100                               |                                                                           |
| MoS <sub>x</sub> Grown on<br>Graphene-Protected 3D<br>Ni Foams[35] | 42.8                                      | 109-141                            |                                                                           |
| MoO <sub>3</sub> -MoS <sub>2</sub><br>Nanowires[36]                | 50-60                                     | 150-200                            |                                                                           |
| MoS <sub>2</sub> on Mesoporous<br>Graphene[37]                     | 42                                        | 90-120                             |                                                                           |
| MoS <sub>2</sub> nanofilms[38]                                     | 43~47                                     | 113                                | 0.13~0.25                                                                 |
| MoS <sub>2</sub> /N-doped CNT[39]                                  | 40                                        | ~75                                | 3.3*10 <sup>-2</sup>                                                      |
| MoS <sub>2</sub> nanoflower/rGO<br>paper[40]                       | 95                                        | 190                                |                                                                           |
| MoS <sub>2</sub> on 3D<br>substrates[41]                           | 62                                        | ~100                               |                                                                           |
| Mesoporous MoS <sub>2</sub> [42]                                   | 50                                        | 150-200                            |                                                                           |

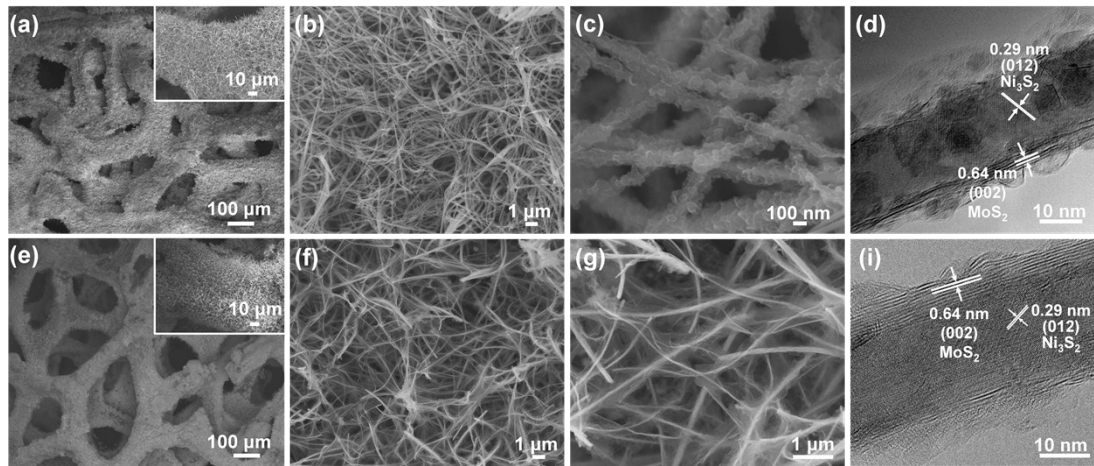

**Figure S1.** SEM and TEM images of (a-d)  $\text{MoS}_2/\text{Ni}_3\text{S}_2@\text{MoS}_2$  and (e-i)  $\text{Ni}_3\text{S}_2@\text{MoS}_2$ .

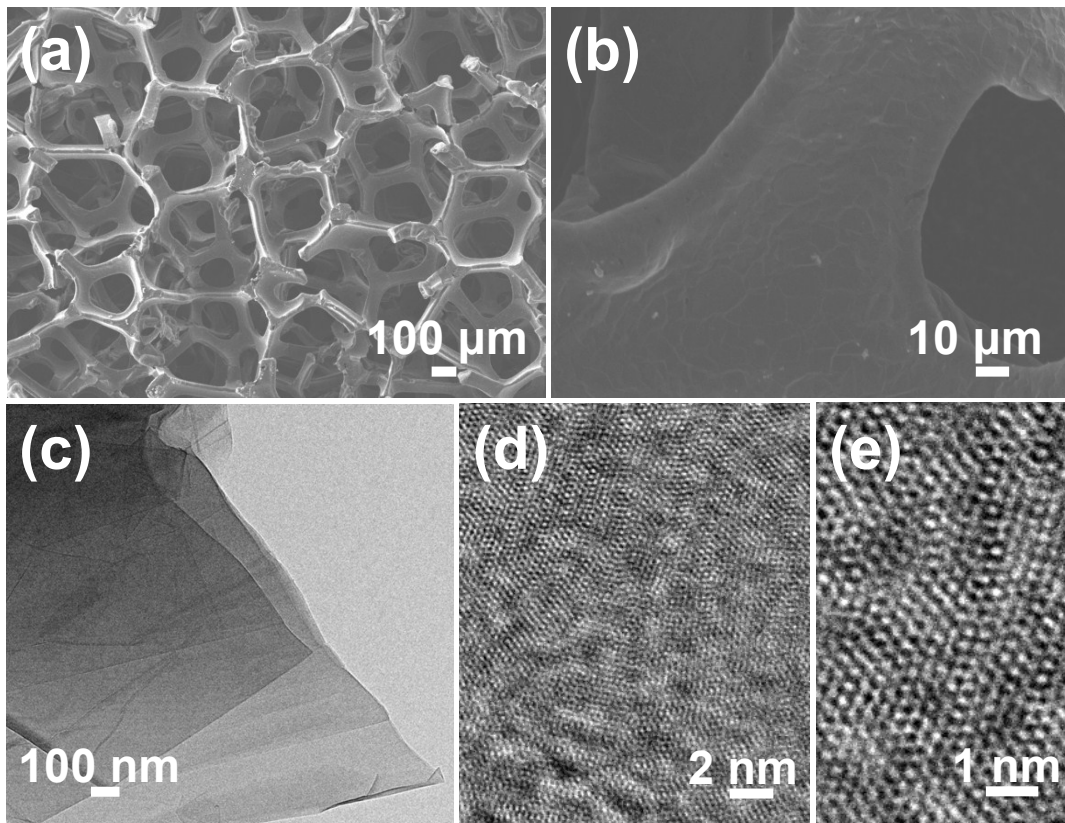

**Figure S2.** SEM (a-b), and TEM (c-e) images of GF.

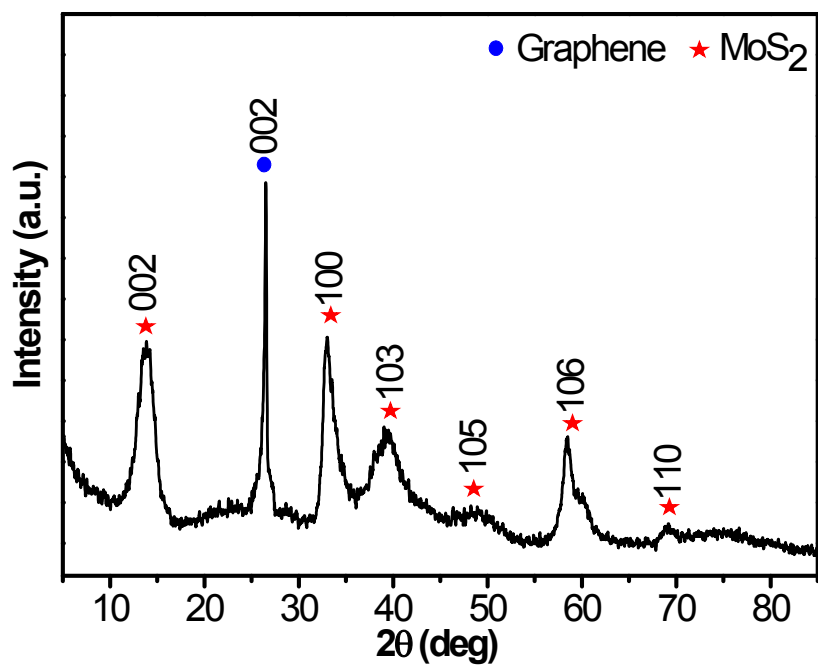

Figure S3 XRD pattern of MT/GF.



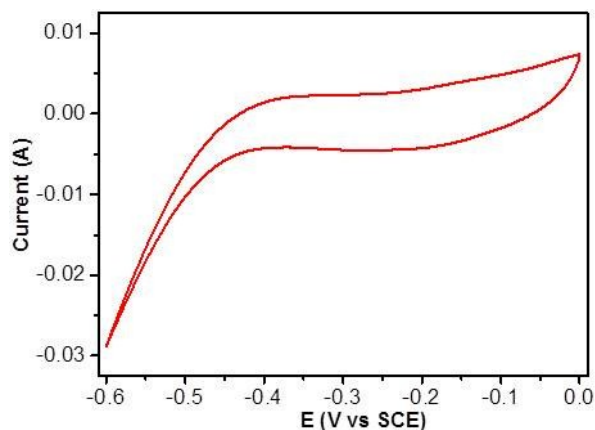

**Figure S4.** Cyclic voltammograms of the MT@MS/GF recorded between -0.6 and 0 V (vs. SCE, in 0.5 M H<sub>2</sub>SO<sub>4</sub>) at a sweep rate of 5 mV s<sup>-1</sup>.

Explanation of the calculation of catalytic parameters:

(a) All the parameters were measured under the same conditions, i.e., the MT@MS/GF and MT/GF catalyst with loading weights of 1.2 and 0.5 mg cm<sup>-2</sup> on GF directly tested in 0.5 M H<sub>2</sub>SO<sub>4</sub> solution;

(b) Calculation of active sites;

The absolute components of voltammetric charges which include both the cathodic and anodic scans can be attained from the CV shown in the **Figure S3**. The total absolute charge is then divided by two, assuming a one electron redox process. Later, this value is further divided by Faraday constant to get number of active sites (in moles) of the MT@MS /GF and MT/GF.

(c) TOFs were measured at  $\eta = 300$  mV;

Once the number of active sites is obtained, the turn over frequency (TOF) can be calculated using the equation:

$$TOF = \frac{I}{Fn} \cdot \frac{1}{2}$$

Where,

I – Current in Amperes during the linear sweep measurement.

F – Faraday constant in C/mol.

n – Number of active sites in mol. The factor ½ represents that 2 electrons are required to form one hydrogen molecule from two protons.

(d) Exchange current densities ( $j_0$ ) were obtained from Tafel curves by using extrapolation methods.



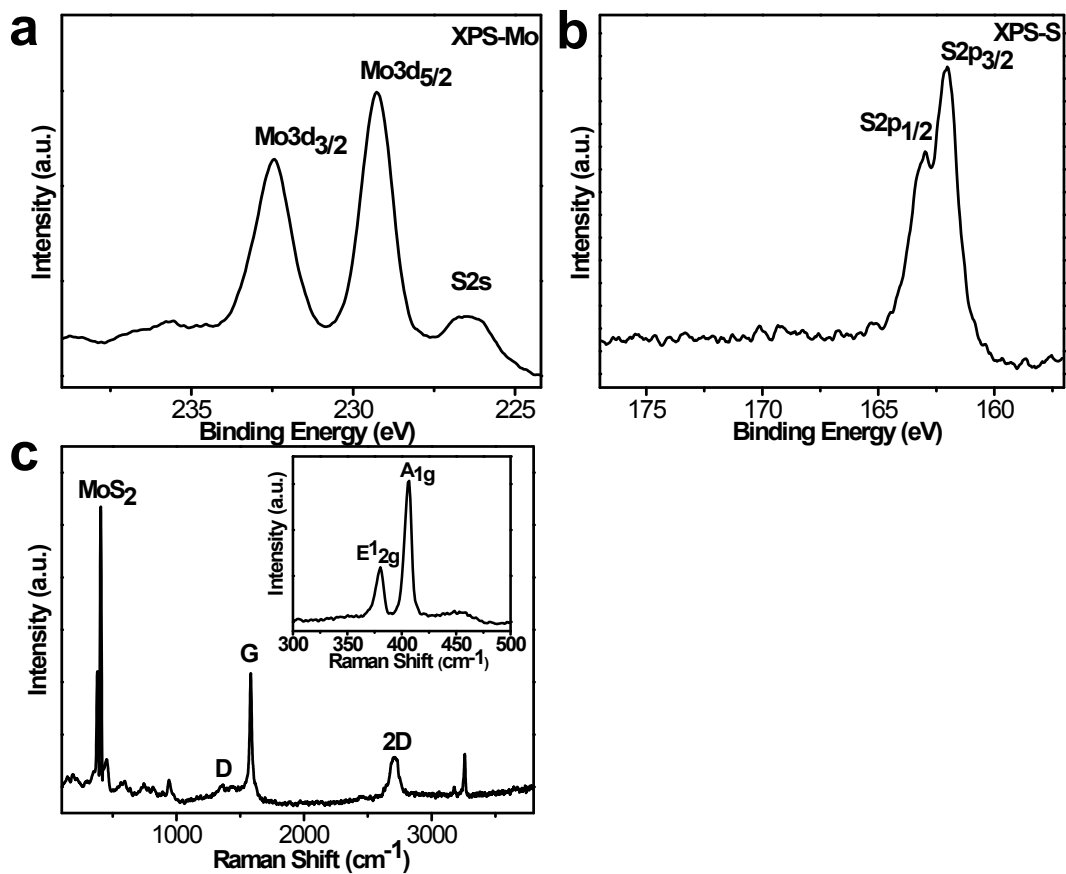

**Figure S5.** Detailed microstructure characterization after long-term HER cycling test. XPS spectra of (a) Mo 3d peaks and (b) S 2p peaks of the MT@MS/GF. (c) Raman spectra of the MT@MS/GF.

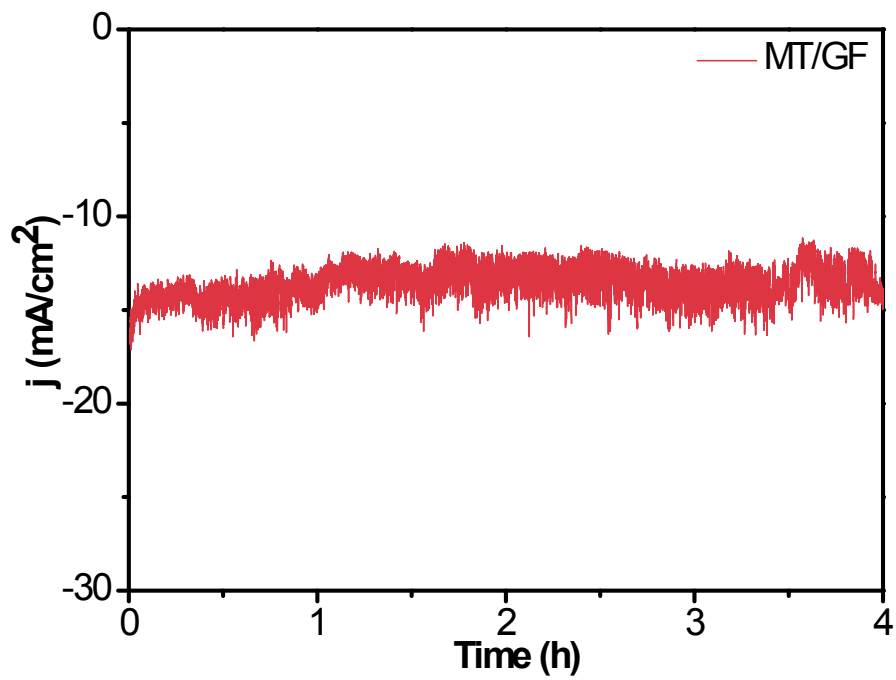

**Figure S6.** Time dependence of current density for the MT/GF catalyst under a constant potential of  $-0.17$  V vs RHE.

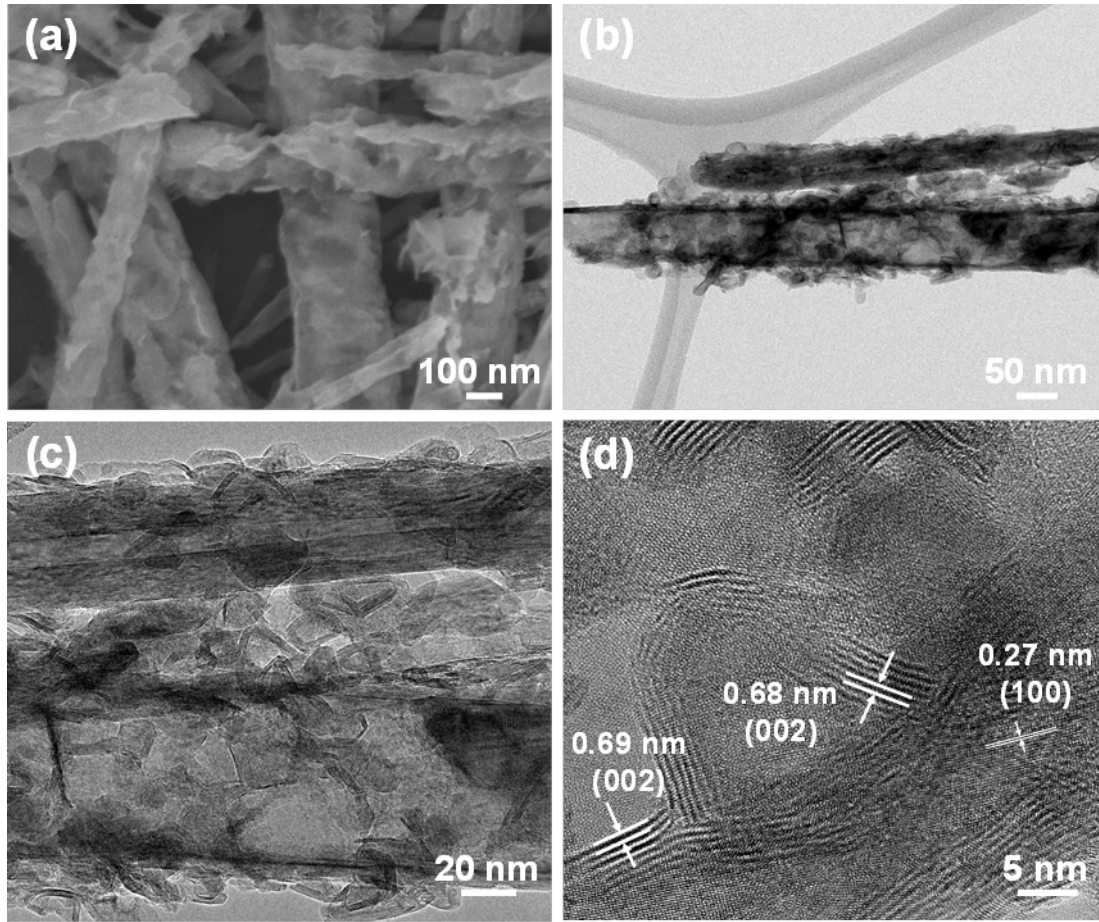

**Figure S7.** Detailed morphology characterization after long-term HER cycling test. a) SEM images of MT@MS. b) TEM image of MT@MS. c, d) HRTEM images of MT@MS, showing MoS<sub>2</sub> nanosheets decorating MoS<sub>2</sub> nanotubes and crystal planes of MT@MS.

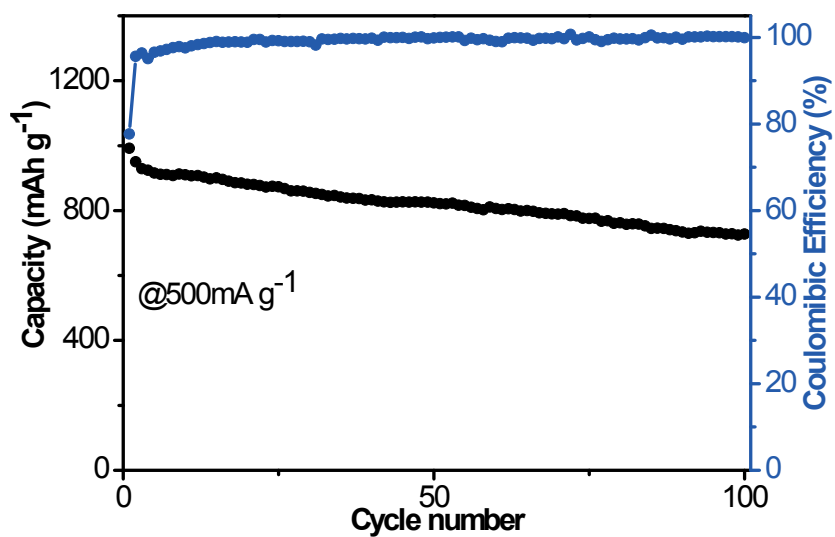

**Figure S8** Cycling behaviors of the MT@MS/GF electrode at a current density of 500 mA g<sup>-1</sup>.

**Table S3** The comparison of electrochemical performances for two electrodes, MT@MS/GF and MT/GF.

| <b>Electrode description</b> | <b>1st Specific capacity (mAhg<sup>-1</sup>)</b>                   | <b>1st Coulombic efficiency</b> | <b>Cycling stability (%)</b>                                             | <b>Rate performance</b>                                                               |
|------------------------------|--------------------------------------------------------------------|---------------------------------|--------------------------------------------------------------------------|---------------------------------------------------------------------------------------|
| MT@MS/GF                     | 1487 mAh g <sup>-1</sup><br><sup>1</sup> at 100 mA g <sup>-1</sup> | 81.7%                           | 892 mAh g <sup>-1</sup> after<br>200 cycles at 500<br>mA g <sup>-1</sup> | 1025, 916 and 775<br>mAh g <sup>-1</sup> at 1000, 2000<br>and 5000 mA g <sup>-1</sup> |
| MT/GF                        | 1382 mAh g <sup>-1</sup><br><sup>1</sup> at 100 mA g <sup>-1</sup> | 75.2%                           | 727 mAh g <sup>-1</sup> after<br>100 cycles at 500<br>mA g <sup>-1</sup> | 894, 765 and 648<br>mAh g <sup>-1</sup> at 1000, 2000<br>and 5000 mA g <sup>-1</sup>  |

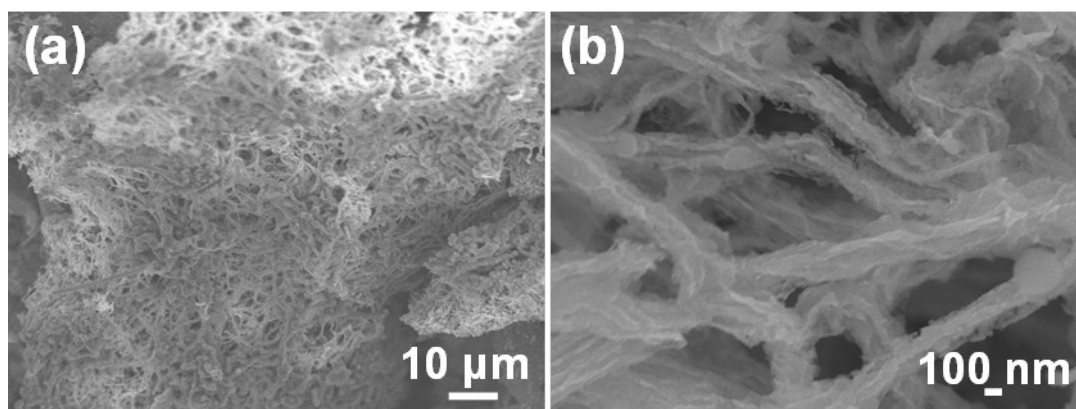

**Figure S9.** SEM images of the MT@MS/GF electrode as anode of LIBs after cycling for 200 times at a current density of  $500 \text{ mA g}^{-1}$ .

**Reference**



1. Wang, J.; Liu, J.; Chao, D.; Yan, J.; Lin, J.; Shen, Z. X., *Adv Mater* **2014**, *26* (42), 7162-9.
3. Kong, D. B.; He, H. Y.; Song, Q.; Wang, B.; Lv, W.; Yang, Q. H.; Zhi, L. J., *Energy & Environmental Science* **2014**, *7* (10), 3320-3325.
4. Zhu, C.; Mu, X.; van Aken, P. A.; Yu, Y.; Maier, J., *Angewandte Chemie International Edition* **2014**, *53* (8), 2152-2156.
5. Zhu, C. B.; Mu, X. K.; van Aken, P. A.; Maier, J.; Yu, Y., *Advanced Energy Materials* **2015**, *5* (4), Doi: 10.1002/Aenm.201401170.
6. Zhang, L.; Lou, X. W., *Chemistry – A European Journal* **2014**, *20* (18), 5219-5223.
7. Yu, H.; Zhu, C.; Zhang, K.; Chen, Y.; Li, C.; Gao, P.; Yang, P.; Ouyang, Q., *Journal of Materials Chemistry A* **2014**, *2* (13), 4551-4557.
8. Cao, X.; Shi, Y.; Shi, W.; Rui, X.; Yan, Q.; Kong, J.; Zhang, H., *Small* **2013**, *9* (20), 3433-3438.
9. Chang, K.; Chen, W., *Chemical Communications* **2011**, *47* (14), 4252-4254.
10. Chang, K.; Chen, W., *ACS Nano* **2011**, *5* (6), 4720-4728.
11. Chang, K.; Chen, W.; Ma, L.; Li, H.; Li, H.; Huang, F.; Xu, Z.; Zhang, Q.; Lee, J.-Y., *Journal of Materials Chemistry* **2011**, *21* (17), 6251-6257.
12. Ding, S.; Chen, J. S.; Lou, X. W., *Chemistry – A European Journal* **2011**, *17* (47), 13142-13145.
13. Das, S. K.; Mallavajula, R.; Jayaprakash, N.; Archer, L. A., *Journal of Materials Chemistry* **2012**, *22* (26), 12988-12992.
14. Ding, S.; Zhang, D.; Chen, J. S.; Lou, X. W., *Nanoscale* **2012**, *4* (1), 95-98.
15. Gong, Y.; Yang, S.; Liu, Z.; Ma, L.; Vajtai, R.; Ajayan, P. M., *Advanced Materials* **2013**, *25* (29), 3979-3984.
16. Hwang, H.; Kim, H.; Cho, J., *Nano Letters* **2011**, *11* (11), 4826-4830.
17. Li, H.; Li, W.; Ma, L.; Chen, W.; Wang, J., *Journal of Alloys and Compounds* **2009**, *471* (1-2), 442-447.
18. Liu, H.; Su, D.; Zhou, R.; Sun, B.; Wang, G.; Qiao, S. Z., *Advanced Energy Materials* **2012**, *2* (8), 970-975.
19. Lu, C.; Liu, W.-w.; Li, H.; Tay, B. K., *Chemical Communications* **2014**.
20. Shi, Y.; Wang, Y.; Wong, J. I.; Tan, A. Y. S.; Hsu, C.-L.; Li, L.-J.; Lu, Y.-C.; Yang, H. Y., *Sci. Rep.* **2013**, *3*.
21. Wang, J.-Z.; Lu, L.; Lotya, M.; Coleman, J. N.; Chou, S.-L.; Liu, H.-K.; Minett, A. I.; Chen, J., *Advanced Energy Materials* **2013**, *3* (6), 798-805.
22. Wang, M.; Li, G.; Xu, H.; Qian, Y.; Yang, J., *ACS Appl Mater Interfaces* **2013**, *5* (3), 1003-8.
23. Wang, P. P.; Sun, H.; Ji, Y.; Li, W.; Wang, X., *Adv Mater* **2014**, *26* (6), 964-9.
24. Wang, Z.; Chen, T.; Chen, W.; Chang, K.; Ma, L.; Huang, G.; Chen, D.; Lee, J. Y., *Journal of Materials Chemistry A* **2013**, *1* (6), 2202-2210.
25. Xiao, J.; Wang, X. J.; Yang, X. Q.; Xun, S. D.; Liu, G.; Koech, P. K.; Liu, J.; Lemmon, J. P., *Advanced Functional Materials* **2011**, *21* (15), 2840-2846.
26. Yang, L.; Wang, S.; Mao, J.; Deng, J.; Gao, Q.; Tang, Y.; Schmidt, O. G., *Advanced Materials* **2013**, *25* (8), 1180-1184.
27. Zhang, C.; Wang, Z.; Guo, Z.; Lou, X. W., *ACS Applied Materials & Interfaces* **2012**, *4* (7), 3765-3768.
28. Zhao, X.; Hu, C.; Cao, M., *Chemistry – An Asian Journal* **2013**, *8* (11), 2701-2707.
29. Zhou, X. S.; Wan, L. J.; Guo, Y. G., *Nanoscale* **2012**, *4* (19), 5868-5871.

30. Chen, Y.; Song, B.; Tang, X.; Lu, L.; Xue, J., *Small* **2014**, *10* (8), 1536-1543.
31. Xu, X.; Fan, Z.; Ding, S.; Yu, D.; Du, Y., *Nanoscale* **2014**, *6* (10), 5245-5250.
32. Xie, J.; Zhang, H.; Li, S.; Wang, R.; Sun, X.; Zhou, M.; Zhou, J.; Lou, X. W.; Xie, Y., *Advanced Materials* **2013**, *25* (40), 5807-5813.
33. Gao, M. R.; Liang, J. X.; Zheng, Y. R.; Xu, Y. F.; Jiang, J.; Gao, Q.; Li, J.; Yu, S. H., *Nat Commun* **2015**, *6*, 5982.
34. Li, Y.; Wang, H.; Xie, L.; Liang, Y.; Hong, G.; Dai, H., *Journal of the American Chemical Society* **2011**, *133* (19), 7296-7299.
35. Chang, Y.-H.; Lin, C.-T.; Chen, T.-Y.; Hsu, C.-L.; Lee, Y.-H.; Zhang, W.; Wei, K.-H.; Li, L.-J., *Advanced Materials* **2013**, *25* (5), 756-760.
36. Chen, Z.; Cummins, D.; Reinecke, B. N.; Clark, E.; Sunkara, M. K.; Jaramillo, T. F., *Nano Letters* **2011**, *11* (10), 4168-4175.
37. Liao, L.; Zhu, J.; Bian, X.; Zhu, L.; Scanlon, M. D.; Girault, H. H.; Liu, B., *Advanced Functional Materials* **2013**, *23* (42), 5326-5333.
38. Wang, H.; Lu, Z.; Xu, S.; Kong, D.; Cha, J. J.; Zheng, G.; Hsu, P.-C.; Yan, K.; Bradshaw, D.; Prinz, F. B.; Cui, Y., *Proceedings of the National Academy of Sciences* **2013**, *110* (49), 19701-19706.
39. Li, D. J.; Maiti, U. N.; Lim, J.; Choi, D. S.; Lee, W. J.; Oh, Y.; Lee, G. Y.; Kim, S. O., *Nano Letters* **2014**, *14* (3), 1228-1233.
40. Ma, C.-B.; Qi, X.; Chen, B.; Bao, S.; Yin, Z.; Wu, X.-J.; Luo, Z.; Wei, J.; Zhang, H.-L.; Zhang, H., *Nanoscale* **2014**, *6* (11), 5624-5629.
41. Wang, H.; Lu, Z.; Kong, D.; Sun, J.; Hymel, T. M.; Cui, Y., *ACS Nano* **2014**, *8* (5), 4940-4947.
42. Kibsgaard, J.; Chen, Z.; Reinecke, B. N.; Jaramillo, T. F., *Nat Mater* **2012**, *11* (11), 963-969.
